# Supplementary material for: Hazardous Waste Management of Buffing Dust Collagen
Source: PubMed Central journal article supplement (PMC7177460; doi:10.3390/ma13071498), 2020-03-25
Supplement: materials-13-01498-s001.pdf [file materials-13-01498-s001.pdf]

# Hazardous Waste Management of Buffing Dust Collagen

Mirosława Prochon \*, Anna Marzec and Oleksandra Dzeikala

Institute of Polymer and Dye Technology, Faculty of Chemistry, Lodz University of Technology, Stefanowskiego 12/16, 90-924 Lodz, Poland

\* Correspondence: mirosława.prochon@p.lodz.pl

**Table S1.** BDC Dust characteristic characteristics.

| SAMPLES  | Elemental Analysis Pract. (teor.) (%) |      |      | IR $\nu_{\max}$ ( $\text{cm}^{-1}$ ) |                                        |                                 |                                                           |                    |                    | Thermal Stability            |                                 |               |               |
|----------|---------------------------------------|------|------|--------------------------------------|----------------------------------------|---------------------------------|-----------------------------------------------------------|--------------------|--------------------|------------------------------|---------------------------------|---------------|---------------|
|          | Cr ( $\text{Cr}_2\text{O}_3$ )        | N    | S    | $\nu(\text{O-H})$                    | $\nu(-\text{CH}_2-)$ ( $\text{CH}_3$ ) | $\nu_{\text{as}}(\text{COO}^-)$ | $\nu(\text{C=O})$                                         | $\nu(-\text{C-O})$ | $\nu(\text{Cr-O})$ | $T_5$ ( $^{\circ}\text{C}$ ) | $T_{50}$ ( $^{\circ}\text{C}$ ) | $U_{150}$ (%) | $P_{800}$ (%) |
| Dust-BDC | 4.48                                  | 8.15 | 3.26 | 3461                                 | 2853                                   | 1410                            | 1654                                                      | 1345               | 528                | 80                           | 310                             | 7.8           | 12            |
| -        | Isoelectric point (IEP)               |      |      | Particle size                        |                                        |                                 | The size of the fraction with the largest numerical share |                    |                    |                              | % - Number                      |               |               |
|          | (-)                                   |      |      | (nm)                                 |                                        |                                 | (nm)                                                      |                    |                    |                              | (%)                             |               |               |
| Dust-BDC | 5.9                                   |      |      | 295–664                              |                                        |                                 | 469                                                       |                    |                    |                              | 31                              |               |               |

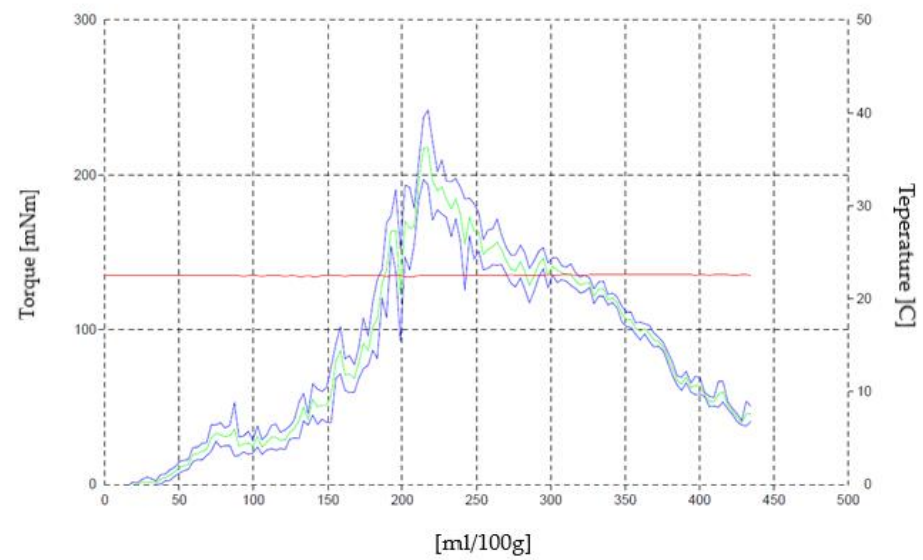

**Figure S1.** BDC Oil number (the sample weight was 4.3 g at 125 rpm and the dosing frequency was 4.0 mL/mL).
